# Supplementary material for: Pediatric Swine Model of Methicillin-Resistant Staphylococcus aureus Sepsis-Induced Coagulopathy, Disseminated Microvascular Thrombosis, and Organ Injuries
Source: PubMed Central journal article supplement — Crit Care Explor. 2023 May 26;5(6):e0916. doi: 10.1097/CCE.0000000000000916 (PMC10226618; doi:10.1097/cce.0000000000000916), 2023-05-26
Supplement: cc9-5-e0916-s001.pdf [file cc9-5-e0916-s001.pdf]

## Supplementary Table 1. Neurological and Respiratory Scores for Piglets.

### Neurological Score

#### Level of consciousness

- 4 Normal/Awake
- 3 Lethargy/arousable but not to full normal state
- 2 Obtunded/some reaction with stimulation
- 1 Coma

#### Behavior

- 4 Normal
- 3 Needs gentle prodding
- 2 Needs vigorous prodding
- 1 No interaction/spontaneous activity

#### Feeding

- 3 Normal
- 2 Needs assistance
- 1 Will not eat

#### Coordination

- 4 Stands normally
- 3 Stands but sways
- 2 Stands but falls over
- 1 Cannot stand

#### Locomotion

- 3 Normal
- 2 Ataxia but more than 2 steps
- 1 Cannot walk more than 2 steps

### Respiratory Score

#### Respiration

- 4 Normal
- 3 Mild increase in respiratory rate
- 2 Moderate increase in respiratory rate, some abdominal breathing
- 1 Severe respiratory distress, significant increase in respiratory rate with abnormal effort

## Supplementary Figure 1. Heart Rate and Mean Arterial Blood Pressure of MRSA Septic and Control Piglets over 70 Hours.

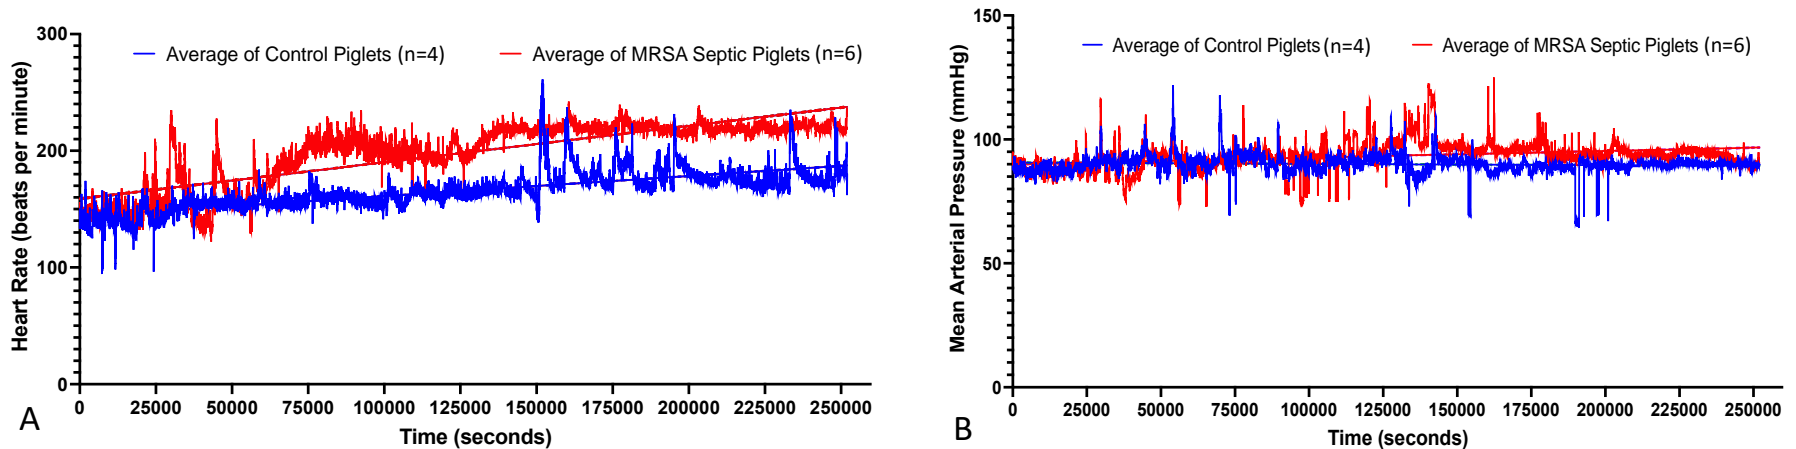

(**Suppl Fig. 1A**) Average heart rate of the septic piglets was clinically higher over the 70h study period compared to control piglets. The simple linear regression slopes of two groups are significantly different ( $P < 0.0001$ ). Septic slope 0.0003124 (95% CI 0.0003088 to 0.0003160). Control slope 0.0001723 (95% CI 0.0001697 to 0.0001750). (**Suppl Fig. 1B**) Average mean arterial blood pressure was not clinically different over time between the septic and control piglets. The simple linear regression slopes of two groups are significantly different ( $P < 0.0001$ ). Control slope of -0.000004982 (95% CI -0.000005897 to -0.00004066). Sepsis slope of 0.00002671 (95% CI 0.0000002549 to 0.00002792). MRSA = methicillin-resistant *Staphylococcus aureus*.

**Supplementary Figure 2.** Apoptotic (TUNEL assay) cell death in the kidney and liver of MRSA septic piglets.

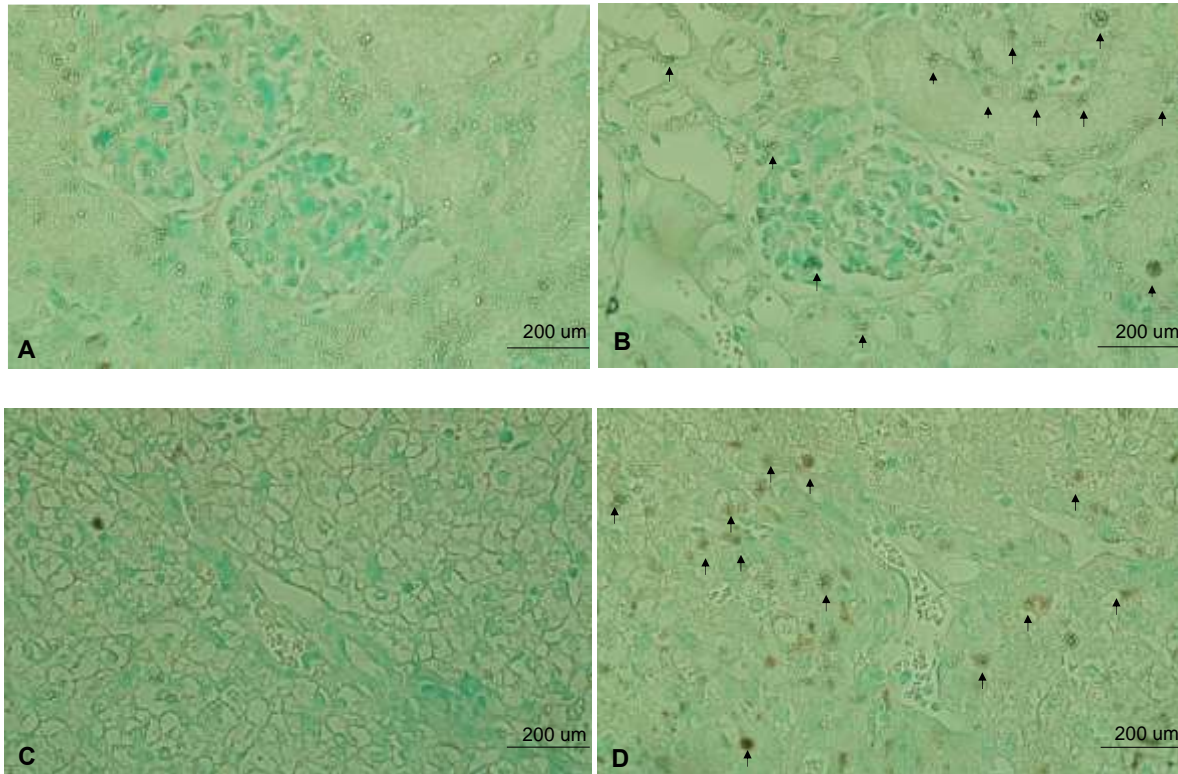

Apoptotic (TUNEL assay) cell death in the kidney and liver of MRSA septic piglets. Representative TUNEL images (brown with arrows) in the kidney (**Suppl Fig. 2B**) and liver (**Suppl Fig. 2D**) of MRSA septic piglets compared to none seen in control kidney (**Suppl Fig. A**) and liver (**Suppl Fig. C**). MRSA = methicillin-resistant *Staphylococcus aureus*.

**Supplementary Table 2.** Serum Kidney & Liver Biomarkers of MRSA Septic Piglets.

| <b>Serum Kidney &amp; Liver Biomarkers of MRSA Septic Piglets</b> |                        |                  |                 |                |                |
|-------------------------------------------------------------------|------------------------|------------------|-----------------|----------------|----------------|
| <b>Piglets</b>                                                    | <b>Hours post-MRSA</b> | <b>BUN mg/dL</b> | <b>Cr mg/dL</b> | <b>ALT U/L</b> | <b>AST U/L</b> |
| <b>MRSA 1</b>                                                     | <b>0h</b>              | 7.64             | 1.04            | 15.32          | 14.43          |
|                                                                   | <b>70h</b>             | 8.12             | 0.96            | 22.8           | 16.5           |
| <b>MRSA 2</b>                                                     | <b>0h</b>              | 7.7              | 1.02            | 21             | 16.58          |
|                                                                   | <b>70h</b>             | 9.6              | 1.04            | 24.9           | 18.2           |
| <b>MRSA 3</b>                                                     | <b>0h</b>              | 8.3              | 1.05            | 28.49          | 25.81          |
|                                                                   | <b>70h</b>             | 7.8              | 0.97            | 32.8           | 23.4           |
| <b>MRSA 4</b>                                                     | <b>0h</b>              | 5.65             | 0.88            | 18.98          | 20.66          |
|                                                                   | <b>70h</b>             | 7.2              | 0.92            | 21.2           | 22.6           |
| <b>MRSA 5</b>                                                     | <b>0h</b>              | 9.15             | 0.86            | 16.48          | 29.86          |
|                                                                   | <b>70h</b>             | 8.25             | 0.93            | 19.5           | 28.4           |
| <b>MRSA 6</b>                                                     | <b>0h</b>              | 7.27             | 0.98            | 21.83          | 22.19          |
|                                                                   | <b>70h</b>             | 8.32             | 0.89            | 22.6           | 25.9           |

BUN = blood urea nitrogen; Cr = creatinine; ALT = alanine transaminase; AST = aspartate Transaminase; MRSA = methicillin-resistant *Staphylococcus aureus*.

**Supplementary Table 3.** Cystatin C Levels in Controls and MRSA Septic Piglets.

| <b>Plasma Cystatin C Levels in Controls and MRSA Septic Piglets</b> |              |                           |
|---------------------------------------------------------------------|--------------|---------------------------|
| <b>Piglets</b>                                                      | <b>Hours</b> | <b>Cystatin C (ng/mL)</b> |
| <b>Control 1</b>                                                    | 0h           | 1.307                     |
|                                                                     | 70h          | 1.237                     |
| <b>Control 2</b>                                                    | 0h           | 1.254                     |
|                                                                     | 70h          | 1.268                     |
| <b>Control 3</b>                                                    | 0h           | 1.349                     |
|                                                                     | 70h          | 1.255                     |
| <b>Control 4</b>                                                    | 0h           | 1.196                     |
|                                                                     | 70h          | 1.16                      |
| <b>MRSA 1</b>                                                       | 0h           | 1.357                     |
|                                                                     | 70h          | 1.375                     |
| <b>MRSA 2</b>                                                       | 0h           | 1.324                     |
|                                                                     | 70h          | 1.256                     |
| <b>MRSA 3</b>                                                       | 0h           | 1.384                     |
|                                                                     | 70h          | 1.284                     |
| <b>MRSA 4</b>                                                       | 0h           | 1.256                     |
|                                                                     | 70h          | 1.277                     |
| <b>MRSA 5</b>                                                       | 0h           | 1.292                     |
|                                                                     | 70h          | 1.298                     |
| <b>MRSA 6</b>                                                       | 0h           | 1.218                     |
|                                                                     | 70h          | 1.229                     |

MRSA = methicillin-resistant *Staphylococcus aureus*.

**Supplementary Table 4.** Serum Creatinine, BUN, AST and ALT Levels in Control and MRSA Septic Piglets at 0, 24, 36, 48, 60 and 70h.

| <b>Serum Creatinine Levels in Control and MRSA Septic Piglets</b> |              |                        |                               |                  |                  |
|-------------------------------------------------------------------|--------------|------------------------|-------------------------------|------------------|------------------|
| <b>Piglets</b>                                                    | <b>Hours</b> | <b>BUN<br/>(mg/dL)</b> | <b>Creatinine<br/>(mg/dL)</b> | <b>ALT (U/L)</b> | <b>AST (U/L)</b> |
| <b>Control 5</b>                                                  | 0h           | 7.9                    | 0.5                           | 34               | 18               |
|                                                                   | 24 h         | 6.9                    | 0.5                           | 40               | 22               |
|                                                                   | 36h          | 6.9                    | 0.5                           | 35               | 17               |
|                                                                   | 48h          | 6.1                    | 0.5                           | 37               | 22               |
|                                                                   | 60h          | 15                     | 0.6                           | 22               | 21               |
|                                                                   | 70h          | 11                     | 0.6                           | 24               | 23               |
| <b>MRSA 7</b>                                                     | 0h           | 8.3                    | 0.5                           | 33               | 19               |
|                                                                   | 24 h         | 7.4                    | 0.5                           | 31               | 18               |
|                                                                   | 36h          | 4.5                    | 0.6                           | 27               | 19               |
|                                                                   | 48h          | 5.1                    | 0.5                           | 23               | 21               |
|                                                                   | 60h          | 4.3                    | 0.6                           | 42               | 20               |
|                                                                   | 70h          | 5.1                    | 0.6                           | 28               | 36               |
| <b>MRSA 8</b>                                                     | 0h           | 7.6                    | 0.6                           | 25               | 14               |
|                                                                   | 24 h         | 7.4                    | 0.6                           | 27               | 24               |
|                                                                   | 36h          | 10.9                   | 0.6                           | 24               | 25               |
|                                                                   | 48h          | 6.7                    | 0.5                           | 20               | 21               |
|                                                                   | 60h          | 2.3                    | 0.5                           | 22               | 25               |
|                                                                   | 70h          | 3.9                    | 0.6                           | 22               | 30               |
| <b>MRSA 9</b>                                                     | 0h           | 31.3                   | 0.7                           | 16               | 15               |
|                                                                   | 24 h         | 30.5                   | 0.9                           | 20               | 30               |
|                                                                   | 36h          | 17.1                   | 0.8                           | 19               | 55               |
|                                                                   | 48h          | 9.5                    | 0.5                           | 27               | 83               |
|                                                                   | 60h          | 3.7                    | 0.5                           | 20               | 30               |
|                                                                   | 70h          | 5.7                    | 0.6                           | 17               | 26               |

MRSA = methicillin-resistant *Staphylococcus aureus*.

**Supplementary Table 5. Arterial Blood Gases of MRSA Septic Piglets.**

| Arterial Blood Gases of MRSA Septic Piglets |                 |       |                          |                         |             |                           |                           |                               |                  |                 |
|---------------------------------------------|-----------------|-------|--------------------------|-------------------------|-------------|---------------------------|---------------------------|-------------------------------|------------------|-----------------|
| Piglets                                     | Hours post-MRSA | pH    | PaCO <sub>2</sub> (mmHg) | PaO <sub>2</sub> (mmHg) | BE (mmol/L) | HCO <sub>3</sub> (mmol/L) | TCO <sub>2</sub> (mmol/L) | O <sub>2</sub> Saturation (%) | Lactate (mmol/L) | Glucose (mg/dL) |
| MRSA 1                                      | 0h              | 7.497 | 37.4                     | 83                      | 6           | 29                        | 30                        | 97                            | 0.47             | 104             |
|                                             | 70h             | 7.595 | 29.8                     | 63                      | 7           | 28.9                      | 30                        | 95                            | 0.54             | 58              |
| MRSA 2                                      | 0h              | 7.496 | 39.5                     | 85                      | 7           | 30.5                      | 32                        | 97                            | 0.52             | 103             |
|                                             | 70h             | 7.565 | 24.9                     | 54                      | 0           | 22.6                      | 23                        | 93                            | 0.34             | 58              |
| MRSA 3                                      | 0h              | 7.534 | 40.3                     | 98                      | 11          | 33.9                      | 35                        | 98                            | 0.55             | 107             |
|                                             | 70h             | 7.527 | 32.4                     | 57                      | 4           | 26.9                      | 28                        | 93                            | 0.81             | 59              |
| MRSA 4                                      | 0h              | 7.488 | 42.2                     | 89                      | 9           | 32                        | 33                        | 97                            | 0.57             | 96              |
|                                             | 70h             | 7.571 | 31.5                     | 89                      | 7           | 28.9                      | 30                        | 98                            | 0.38             | 51              |
| MRSA 5                                      | 0h              | 7.487 | 41.2                     | 80                      | 8           | 31.2                      | 32                        | 97                            | 0.5              | 106             |
|                                             | 70h             | 7.52  | 35.1                     | 75                      | 6           | 28.6                      | 30                        | 96                            | 0.5              | 56              |
| MRSA 6                                      | 0h              | 7.501 | 38.2                     | 80                      | 7           | 29.9                      | 31                        | 97                            | 0.35             | 106             |
|                                             | 70h             | 7.656 | 25.6                     | 77                      | 8           | 28.6                      | 29                        | 98                            | 0.64             | 58              |

PaCO<sub>2</sub> = arterial partial pressure of carbon dioxide; PaO<sub>2</sub> = arterial partial pressure of oxygen; BE = base excess; HCO<sub>3</sub> = bicarbonate; TCO<sub>2</sub> = total carbon dioxide; O<sub>2</sub> = oxygen; MRSA = methicillin-resistant *Staphylococcus aureus*.
